# Supplementary material for: Lebenszeitprävalenz des Erlebens von Sex und sexueller Berührung gegen den eigenen Willen sowie Zusammenhänge mit gesundheitsbezogenen Faktoren
Source: Springer Nature journal article supplement (doi:10.1007/s00103-021-03434-6), 2021-10-18
Supplement: MOESM1 [file 19767912]

**Lebenszeitprävalenz des Erlebens von Sex und sexueller Berührung gegen den eigenen Willen sowie Zusammenhänge mit gesundheitsbezogenen Faktoren. Ergebnisse aus der Studie Gesundheit und Sexualität (GeSiD) in Deutschland**

Franziska Brunner<sup>1</sup>, Safiye Tozdan<sup>1</sup>, Verena Klein<sup>1</sup>, Arne Dekker<sup>1</sup>, Peer Briken<sup>1</sup>

<sup>1</sup>Institut für Sexualforschung, Sexualmedizin & Forensische Psychiatrie, Universitätsklinikum Hamburg-Eppendorf, Hamburg, Deutschland

**Korrespondenzadresse**

Dr. phil. Franziska Brunner  
Institut für Sexualforschung, Sexualmedizin und Forensische Psychiatrie  
Universitätsklinikum Hamburg-Eppendorf  
Martinistraße 52  
20246 Hamburg  
Deutschland  
[f.brunner@uke.de](mailto:f.brunner@uke.de)

**Inhalte:**

Tabelle A1. Zusammenhänge von Sex\_gegen\_Willen mit soziodemografischen und gesundheitsbezogenen Faktoren

Tabelle A2. Zusammenhänge von Berührung\_gegen\_Willen (exkl. Sex\_gegen\_Willen) mit soziodemografischen und gesundheitsbezogenen Faktoren

Tabelle A3. Zusammenhänge für Sex\_gegen\_Willen und Berührung\_gegen\_Willen\* im Kindesalter\*\* mit soziodemografischen und gesundheitsbezogenen Faktoren

Tabelle A1. Zusammenhänge von Sex\_gegen\_Willen mit soziodemografischen und gesundheitsbezogenen Faktoren

|                                               | Frauen                         |      |                            | Männer                         |      |                            |
|-----------------------------------------------|--------------------------------|------|----------------------------|--------------------------------|------|----------------------------|
|                                               | Adjusted Odds Ratios* [95% KI] | p    | n (ungewichtet; gewichtet) | Adjusted Odds Ratios* [95% KI] | p    | n (ungewichtet; gewichtet) |
| <b>Altersgruppe</b>                           |                                | .021 |                            |                                | .074 |                            |
| 18- bis 25-Jährige                            | 1.00                           |      | 373; 279                   | 1.00                           |      | 385; 308                   |
| 26- bis 35-Jährige                            | 0.97 [0.65-1.44]               |      | 558; 416                   | 1.25 [0.59-2.66]               |      | 535; 445                   |
| 36- bis 45-Jährige                            | 0.83 [0.54-1.28]               |      | 427; 396                   | 1.90 [0.77-4.69]               |      | 375; 398                   |
| 46- bis 55-Jährige                            | 0.83 [0.52-1.31]               |      | 493; 520                   | 0.96 [0.39-2.37]               |      | 360; 537                   |
| 56- bis 65-Jährige                            | 1.24 [0.82-1.89]               |      | 490; 467                   | 0.64 [0.23-1.74]               |      | 373; 458                   |
| 66- bis 75-Jährige                            | 0.48 [0.26-0.90]               |      | 238; 346                   | 0.42 [0.13-1.40]               |      | 284; 309                   |
| <b>Bildung</b>                                |                                | .531 |                            |                                | .079 |                            |
| niedrig                                       | 1.00                           |      | 454; 689                   | 1.00                           |      | 537; 848                   |
| mittel                                        | 0.89 [0.63-1.26]               |      | 877; 854                   | 1.20 [0.54-2.65]               |      | 664; 708                   |
| hoch                                          | 1.07 [0.76-1.49]               |      | 1248; 882                  | 1.28 [0.66-2.48]               |      | 1111; 901                  |
| <b>Deprivationsindex</b>                      |                                | .486 |                            |                                | .638 |                            |
| 1 (niedrigstes Quintil)                       | 1.00                           |      | 850; 756                   | 1.00                           |      | 691; 763                   |
| 2-4                                           | 0.96 [0.73-1.25]               |      | 1410; 1325                 | 1.34 [0.72-2.50]               |      | 1274; 1330                 |
| 5 (höchstes Quintil)                          | 0.78 [0.52-1.18]               |      | 319; 344                   | 1.25 [0.55-2.85]               |      | 347; 363                   |
| <b>Lebensqualität</b>                         |                                | .000 |                            |                                | .000 |                            |
| hoch                                          | 1.00                           |      | 1441; 1358                 | 1.00                           |      | 1348; 1382                 |
| mittel                                        | 1.87 [1.44-2.43]               |      | 1081; 1003                 | 1.78 [0.96-3.30]               |      | 918; 1016                  |
| niedrig                                       | 3.39 [1.60-7.19]               |      | 55; 60                     | 10.74 [3.75-30.70]             |      | 40; 54                     |
| <b>allgemeiner Gesundheitszustand</b>         |                                | .000 |                            |                                | .000 |                            |
| Sehr gut/gut                                  | 1.00                           |      | 2001; 1811                 | 1.00                           |      | 1898; 1952                 |
| Mittelmäßig                                   | 2.12 [1.55-2.89]               |      | 474; 492                   | 1.37 [0.65-2.89]               |      | 335; 403                   |
| Schlecht/sehr schlecht                        | 3.93 [2.27-6.79]               |      | 94; 109                    | 6.86 [2.74-17.21]              |      | 75; 97                     |
| <b>chronische Erkrankung oder Behinderung</b> |                                | .000 |                            |                                | .025 |                            |
| nein                                          | 1.00                           |      | 1769; 1625                 | 1.00                           |      | 1658; 1697                 |
| ja                                            | 2.66 [1.95-3.63]               |      | 754; 738                   | 1.97 [1.09-3.55]               |      | 612; 705                   |
| <b>Depressionsbehandlung im letzten Jahr</b>  |                                | .000 |                            |                                | .013 |                            |
| nein                                          | 1.00                           |      | 2310; 2158                 | 1.00                           |      | 2189; 2317                 |
| ja                                            | 3.47 [2.51-4.80]               |      | 269; 267                   | 3.02 [1.27-7.20]               |      | 123; 139                   |

|                                                                           |                  |      |            |                   |            |
|---------------------------------------------------------------------------|------------------|------|------------|-------------------|------------|
| <b>Behandlung aufgrund anderer psychischer Erkrankung im letzten Jahr</b> |                  | .000 |            | .000              |            |
| nein                                                                      | 1.00             |      | 2454; 2316 | 1.00              | 2248; 2388 |
| ja                                                                        | 3.15 [2.04-4.86] |      | 125; 109   | 5.06 [2.19-11.69] | 64; 68     |
| <b>Body-Mass-Index</b>                                                    |                  | .656 |            | .541              |            |
| normal: 18.5-25 kg/m <sup>2</sup>                                         | 1.00             |      | 1358; 1188 | 1.00              | 932; 928   |
| untergewichtig: <18.5 kg/m <sup>2</sup>                                   | 1.46 [0.81-2.65] |      | 81; 63     | 2.68 [0.56-12.84] | 23; 26     |
| übergewichtig: 25-30 kg/m <sup>2</sup>                                    | 1.11 [0.81-1.53] |      | 668; 663   | 1.20 [0.65-2.20]  | 913; 980   |
| adipös: >30 kg/m <sup>2</sup>                                             | 1.09 [0.74-1.61] |      | 454; 495   | 1.46 [0.72-2.96]  | 432; 497   |
| <b>riskantes Trinkverhalten</b>                                           |                  | .185 |            | .039              |            |
| nein                                                                      | 1.00             |      | 1403; 1389 | 1.00              | 1107; 1211 |
| Ja                                                                        | 1.20 [0.92-1.56] |      | 1046; 899  | 0.57 [0.33-0.97]  | 1120; 1140 |
| <b>Rauchen (gelegentlich oder regelmäßig)</b>                             |                  | .009 |            | .072              |            |
| nein                                                                      | 1.00             |      | 1833; 1679 | 1.00              | 1500; 1544 |
| Ja                                                                        | 1.42 [1.09-1.83] |      | 739; 739   | 1.61 [0.96-2.70]  | 801; 900   |
| <b>Drogenkonsum im letzten Jahr</b>                                       |                  | .000 |            | .674              |            |
| nein                                                                      | 1.00             |      | 2327; 2232 | 1.00              | 1893; 2090 |
| ja, ausschließlich Cannabis                                               | 1.84 [1.27-2.68] |      | 196; 147   | 1.38 [0.60-3.17]  | 300; 258   |
| ja, andere                                                                | 4.31 [1.88-9.88] |      | 31; 20     | 1.49 [0.40-5.52]  | 87; 76     |

---

\*adjustiert für Alter, Bildung und Deprivationsindex

Tabelle A2. Zusammenhänge von Berührung\_gegen\_Willen (exkl. Sex\_gegen\_Willen) mit soziodemografischen und gesundheitsbezogenen Faktoren

|                                                                               | Frauen                             |      | n (ungewichtet;<br>gewichtet) | Männer                             |      | n (ungewichtet;<br>gewichtet) |
|-------------------------------------------------------------------------------|------------------------------------|------|-------------------------------|------------------------------------|------|-------------------------------|
|                                                                               | Adjusted Odds<br>Ratios** [95% KI] | p    |                               | Adjusted Odds<br>Ratios** [95% KI] | p    |                               |
| <b>Altersgruppe</b>                                                           |                                    | .094 |                               |                                    | .388 |                               |
| 18- bis 25-Jährige                                                            | 1.00                               |      | 311; 232                      | 1.00                               |      | 375; 299                      |
| 26- bis 35-Jährige                                                            | 1.19 [0.86-1.64]                   |      | 467; 340                      | 0.82 [0.49-1.35]                   |      | 515; 429                      |
| 36- bis 45-Jährige                                                            | 1.00 [0.66-1.50]                   |      | 369; 341                      | 1.12 [0.63-1.98]                   |      | 358; 375                      |
| 46- bis 55-Jährige                                                            | 1.60 [1.08-2.38]                   |      | 422; 450                      | 1.04 [0.61-1.77]                   |      | 347; 524                      |
| 56- bis 65-Jährige                                                            | 1.33 [0.88-2.02]                   |      | 398; 376                      | 1.11 [0.65-1.89]                   |      | 364; 448                      |
| 66- bis 75-Jährige                                                            | 1.15 [0.72-1.83]                   |      | 219; 312                      | 0.60 [0.31-1.14]                   |      | 278; 305                      |
| <b>Bildung</b>                                                                |                                    | .015 |                               |                                    | .006 |                               |
| niedrig                                                                       | 1.00                               |      | 382; 578                      | 1.00                               |      | 518; 826                      |
| mittel                                                                        | 1.28 [0.93-1.75]                   |      | 750; 734                      | 0.67 [0.42-1.05]                   |      | 645; 687                      |
| hoch                                                                          | 1.56 [1.15-2.12]                   |      | 1054; 738                     | 1.35 [0.91-2.01]                   |      | 1074; 868                     |
| <b>Deprivationsindex</b>                                                      |                                    | .238 |                               |                                    | .288 |                               |
| 1 (niedrigstes Quintil)                                                       | 1.00                               |      | 713; 635                      | 1.00                               |      | 678; 748                      |
| 2-4                                                                           | 0.85 [0.67-1.08]                   |      | 1198; 1122                    | 1.12 [0.80-1.55]                   |      | 1223; 1281                    |
| 5 (höchstes Quintil)                                                          | 0.73 [0.49-1.10]                   |      | 275; 293                      | 0.78 [0.49-1.23]                   |      | 336; 351                      |
| <b>Lebensqualität</b>                                                         |                                    | .001 |                               |                                    | .214 |                               |
| hoch                                                                          | 1.00                               |      | 1273; 1199                    | 1.00                               |      | 1318; 1351                    |
| mittel                                                                        | 1.53 [1.24-1.89]                   |      | 871; 808                      | 1.19 [0.85-1.68]                   |      | 882; 983                      |
| niedrig                                                                       | 1.37 [0.66-2.82]                   |      | 42; 43                        | 2.36 [0.81-6.90]                   |      | 32; 43                        |
| <b>allgemeiner Gesundheitszustand</b>                                         |                                    | .623 |                               |                                    | .011 |                               |
| Sehr gut/gut                                                                  | 1.00                               |      | 1734; 1572                    | 1.00                               |      | 1842; 1894                    |
| Mittelmäßig                                                                   | 1.15 [0.86-1.55]                   |      | 372; 388                      | 1.47 [0.93-2.33]                   |      | 325; 393                      |
| Schlecht/sehr schlecht                                                        | 1.09 [0.59-2.01]                   |      | 70; 77                        | 2.95 [1.40-6.22]                   |      | 66; 90                        |
| <b>chronische Erkrankung oder Behinderung</b>                                 |                                    | .082 |                               |                                    | .000 |                               |
| nein                                                                          | 1.00                               |      | 1540;1423                     | 1.00                               |      | 1613;1652                     |
| ja                                                                            | 1.28 [0.97-1.69]                   |      | 593; 571                      | 2.11 [1.51-2.94]                   |      | 586; 680                      |
| <b>Depressionsbehandlung im letzten Jahr</b>                                  |                                    | .037 |                               |                                    | .018 |                               |
| nein                                                                          | 1.00                               |      | 2009; 1867                    | 1.00                               |      | 2123; 2251                    |
| ja                                                                            | 1.50 [1.03-2.18]                   |      | 177; 182                      | 1.96 [1.12-3.41]                   |      | 114; 130                      |
| <b>Behandlung aufgrund anderer psychischer<br/>Erkrankung im letzten Jahr</b> |                                    | .103 |                               |                                    | .079 |                               |
| nein                                                                          | 1.00                               |      | 2104; 1978                    | 1.00                               |      | 2180; 2319                    |
| ja                                                                            | 1.50 [0.92-2.45]                   |      | 82; 72                        | 2.06 [0.92-4.62]                   |      | 57; 62                        |

|                                               |                   |      |            |                  |            |
|-----------------------------------------------|-------------------|------|------------|------------------|------------|
| <b>Body-Mass-Index</b>                        |                   | .176 |            | .714             |            |
| normal: 18.5-25 kg/m <sup>2</sup>             | 1.00              |      | 1157; 1008 | 1.00             | 908; 908   |
| untergewichtig: <18.5 kg/m <sup>2</sup>       | 1.06 [0.59- 1.89] |      | 63; 49     | 1.24 [0.46-3.33] | 21; 24     |
| übergewichtig: 25-30 kg/m <sup>2</sup>        | 0.72 [0.54-0.97]  |      | 562; 556   | 0.87 [0.60-1.25] | 882; 944   |
| adipös: >30 kg/m <sup>2</sup>                 | 0.87 [0.61-1.24]  |      | 393; 427   | 1.05 [0.69-1.61] | 406; 482   |
| <b>riskantes Trinkverhalten</b>               |                   | .003 |            | .652             |            |
| nein                                          | 1.00              |      | 1202; 1188 | 1.00             | 1068; 1168 |
| ja                                            | 1.42 [1.13-1.78]  |      | 874; 745   | 1.08 [0.77-1.51] | 1090; 1114 |
| <b>Rauchen (gelegentlich oder regelmäßig)</b> |                   | .016 |            | .524             |            |
| nein                                          | 1.00              |      | 1583; 1442 | 1.00             | 1458; 1504 |
| ja                                            | 1.36 [1.06-1.76]  |      | 596; 601   | 1.12 [0.79-1.59] | 769; 867   |
| <b>Drogenkonsum im letzten Jahr</b>           |                   | .001 |            | .042             |            |
| nein                                          | 1.00              |      | 2001; 1906 | 1.00             | 1833; 2026 |
| ja, ausschließlich Cannabis                   | 2.26 [1.42-3.60]  |      | 145; 112   | 1.55 [0.97-2.47] | 289; 247   |
| ja, andere                                    | 1.01 [0.35-2.89]  |      | 19; 11     | 2.20 [1.01-4.78] | 83; 72     |

\* Berührung\_gegen\_Willen (exkl. Sex\_gegen\_Willen); \*\* adjustiert für Alter, Bildung und Deprivations-Index

Tabelle A3. Zusammenhänge für Sex\_gegen\_Willen und Berührung\_gegen\_Willen\* im Kindesalter\*\* mit soziodemografischen und gesundheitsbezogenen Faktoren

|                                                                           | Sex_gegen_Willen                 |      |                            | Berührung_gegen_Willen*          |      |                            |
|---------------------------------------------------------------------------|----------------------------------|------|----------------------------|----------------------------------|------|----------------------------|
|                                                                           | Adjusted Odds Ratios*** [95% KI] | p    | n (ungewichtet; gewichtet) | Adjusted Odds Ratios*** [95% KI] | p    | n (ungewichtet; gewichtet) |
| <b>Altersgruppe</b>                                                       |                                  | .258 |                            |                                  | .006 |                            |
| 18- bis 25-Jährige                                                        | 1.00                             |      | 757; 586                   | 1.00                             |      | 673; 520                   |
| 26- bis 35-Jährige                                                        | 0.96 [0.41-2.24]                 |      | 1085; 853                  | 2.62 [1.29-5.31]                 |      | 963; 752                   |
| 36- bis 45-Jährige                                                        | 1.11 [0.42-2.91]                 |      | 796; 789                   | 1.99 [0.88-4.55]                 |      | 715; 698                   |
| 46- bis 55-Jährige                                                        | 1.48 [0.61-3.61]                 |      | 842; 1039                  | 4.27 [1.94-9.37]                 |      | 750; 949                   |
| 56- bis 65-Jährige                                                        | 2.25 [0.91-5.58]                 |      | 859; 919                   | 3.49 [1.47-8.30]                 |      | 748; 810                   |
| 66- bis 75-Jährige                                                        | 1.14 [0.34-3.77]                 |      | 521; 653                   | 2.64 [1.08-6.42]                 |      | 490; 608                   |
| <b>Bildung</b>                                                            |                                  | .504 |                            |                                  | .327 |                            |
| niedrig                                                                   | 1.00                             |      | 980; 1516                  | 1.00                             |      | 879; 1364                  |
| mittel                                                                    | 0.80 [0.45-1.43]                 |      | 1536; 1551                 | 1.43 [0.85-2.41]                 |      | 1374; 1399                 |
| hoch                                                                      | 1.13 [0.61-2.09]                 |      | 2344; 1772                 | 1.29 [0.76-2.19]                 |      | 2086; 1574                 |
| <b>Deprivationsindex</b>                                                  |                                  | .850 |                            |                                  | .489 |                            |
| 1 (niedrigstes Quintil)                                                   | 1.00                             |      | 1535; 1511                 | 1.00                             |      | 1363; 1356                 |
| 2-4                                                                       | 1.17 [0.68-2.03]                 |      | 2663; 2629                 | 0.85 [0.54-1.34]                 |      | 2374; 2347                 |
| 5 (höchstes Quintil)                                                      | 1.12 [0.49-2.56]                 |      | 662; 698                   | 0.67 [0.34-1.32]                 |      | 602; 635                   |
| <b>Lebensqualität</b>                                                     |                                  | .005 |                            |                                  | .068 |                            |
| hoch                                                                      | 1.00                             |      | 2779; 2724                 | 1.00                             |      | 2547; 2503                 |
| mittel                                                                    | 1.73 [1.00-2.98]                 |      | 1981; 1997                 | 1.37 [0.96-1.96]                 |      | 1714; 1746                 |
| niedrig                                                                   | 4.98 [1.82-13.63]                |      | 92; 109                    | 0.43 [0.13-1.48]                 |      | 73; 85                     |
| <b>allgemeiner Gesundheitszustand</b>                                     |                                  | .000 |                            |                                  | .307 |                            |
| Sehr gut/gut                                                              | 1.00                             |      | 3883; 3740                 | 1.00                             |      | 3509; 3390                 |
| Mittelmäßig                                                               | 2.62 [1.58-4.37]                 |      | 799; 882                   | 1.19 [0.72-1.96]                 |      | 682; 766                   |
| Schlecht/sehr schlecht                                                    | 4.27 [1.88-9.70]                 |      | 164; 199                   | 1.85 [0.81-4.22]                 |      | 134; 164                   |
| <b>chronische Erkrankung oder Behinderung</b>                             |                                  | .003 |                            |                                  | .446 |                            |
| nein                                                                      | 1.00                             |      | 3415; 3308                 | 1.00                             |      | 3099; 3015                 |
| ja                                                                        | 2.02 [1.28-3.21]                 |      | 1349; 1419                 | 1.18 [0.77-1.80]                 |      | 1153; 1226                 |
| <b>Depressionsbehandlung im letzten Jahr</b>                              |                                  | .000 |                            |                                  | .100 |                            |
| nein                                                                      | 1.00                             |      | 4480; 4445                 | 1.00                             |      | 4056; 4035                 |
| ja                                                                        | 4.05 [2.43-6.75]                 |      | 380; 393                   | 1.61 [0.91-2.84]                 |      | 283; 303                   |
| <b>Behandlung aufgrund anderer psychischer Erkrankung im letzten Jahr</b> |                                  | .000 |                            |                                  | .048 |                            |
| nein                                                                      | 1.00                             |      | 4674; 4664                 | 1.00 []                          |      | 4201; 4205                 |
| ja                                                                        | 4.41 [2.38-8.19]                 |      | 186; 175                   | 2.05 [1.01-4.19]                 |      | 138; 133                   |

|                                               |                  |            |                  |            |
|-----------------------------------------------|------------------|------------|------------------|------------|
| <b>Body-Mass-Index</b>                        |                  | .308       |                  | .383       |
| normal: 18.5-25 kg/m <sup>2</sup>             | 1.00             | 2272; 2097 | 1.00             | 2019; 1870 |
| untergewichtig: <18.5 kg/m <sup>2</sup>       | 2.03 [0.55-7.51] | 104; 89    | 1.93 [0.67-5.57] | 83; 72     |
| übergewichtig: 25-30 kg/m <sup>2</sup>        | 1.52 [0.80-2.89] | 1573; 1628 | 1.18 [0.72-1.95] | 1424; 1478 |
| adipös: >30 kg/m <sup>2</sup>                 | 1.73 [0.86-3.49] | 872; 984   | 1.49 [0.89-2.51] | 783; 885   |
| <b>riskantes Trinkverhalten</b>               |                  | .572       |                  | .084       |
| nein                                          | 1.00             | 2499; 2580 | 1.00             | 2232; 2317 |
| ja                                            | 0.86 [0.52-1.44] | 2151; 2022 | 1.37 [0.96-1.97] | 1926; 1817 |
| <b>Rauchen (gelegentlich oder regelmäßig)</b> |                  | .455       |                  | .036       |
| nein                                          | 1.00             | 3316; 3199 | 1.00             | 2978; 2877 |
| ja                                            | 1.18 [0.76-1.85] | 1527; 1622 | 1.49 [1.03-2.16] | 1345; 1446 |
| <b>Drogenkonsum im letzten Jahr</b>           |                  | .029       |                  | .596       |
| nein                                          | 1.00             | 4194; 4283 | 1.00             | 3765; 3855 |
| ja, ausschließlich Cannabis                   | 1.81 [0.89-3.71] | 492; 402   | 1.37 [0.68-2.77] | 424; 350   |
| ja, andere                                    | 3.45 [1.27-9.37] | 117; 95    | 1.39 [0.32-5.98] | 99; 79     |

\* Berührung\_gegen\_Willen (exkl. Sex\_gegen\_Willen); \*\* < 14 Jahren und Altersabstand zur/m Beschuldigten von mind. 5 Jahren; \*\*\* adjustiert für Alter, Bildung und Deprivationsindex
